1 **Molecular signature and target-specificity of inhibitory circuits formed by**  
2 **Martinotti cells in the mouse barrel cortex**

3 Cristina Donato<sup>1,2</sup>, Carolina Cabezas<sup>1</sup>, Andrea Aguirre<sup>1</sup>, Joana Lourenço<sup>1</sup>, Marie-Claude Potier<sup>1</sup>, Javier  
4 Zorrilla de San Martín<sup>1\*</sup>, Alberto Bacci<sup>1\*</sup>

5

6 <sup>1</sup>Sorbonne Université, Institut du Cerveau - Paris Brain Institute - ICM, Inserm, CNRS, APHP, Hôpital de  
7 la Pitié Salpêtrière, Paris, France

8 <sup>2</sup>Present address: Luxembourg Centre for Systems Biomedicine, University of Luxembourg, Belvaux,  
9 12 L-4367, Luxembourg.

10

11 **\*Corresponding authors:** [alberto.bacci@icm-institute.org](mailto:alberto.bacci@icm-institute.org); [javier.zorrilla@icm-institute.org](mailto:javier.zorrilla@icm-institute.org)

12

13 **Abbreviated title (50-character maximum):** Martinotti-mediated target-dependent inhibition.

14 Number of pages: 37

15 Number of Figures: 6

16 Number of tables: 0

17

18 **Number of words:** Abstract: 247      Introduction: 1214      Discussion: 1706

19

20 **Conflict of Interest:** The authors declare no competing financial interests.

21

22 **Acknowledgments:** We thank the ICM technical facilities PHENO-ICMICE, iGENSEQ and ICM.Quant.  
23 This work was supported by “Investissements d’avenir” ANR-10-IAIHU-06, BBT-MOCONET1 ; BBT-  
24 MOCONET2; Agence Nationale de la Recherche (ANR-13-BSV4-0015-01 ; ANR-16-CE16-0007-02 ; ANR-  
25 17-CE16-0026-01 ; ANR-18-CE16-0011-01 ; ANR-20-CE16-0011-01; ANR-12-EMMA-0010;), Fondation  
26 Recherche Médicale (Equipe FRM DEQ20150331684 and EQU201903007860), NARSAD independent  
27 Investigator Grant and Fondation Lejeune (#1790). CD was supported by the École de Neurosciences  
28 de Paris et Île de France (ENP) and by the Labex Bio-Psy. PHENO-ICMICE was supported by two  
29 “Investissements d’avenir” (ANR-10-IAIHU-06 and ANR-11-INBS-0011-NeurATRIS) and the “Fondation  
30 pour la Recherche Médicale”.

## 31 **Abstract**

32 In the neocortex, fast synaptic inhibition orchestrates both spontaneous and sensory-evoked  
33 activity. GABAergic interneurons (INs) inhibit pyramidal neurons (PNs) directly, modulating their  
34 output activity and thus contributing to balance cortical networks. Moreover, several IN subtypes also  
35 inhibit other INs, forming specific disinhibitory circuits, which play crucial roles in several cognitive  
36 functions. Here, we studied a homogeneous subpopulation of somatostatin (SST)-positive INs, the  
37 Martinotti cells (MCs) in layer 2/3 of the mouse barrel cortex (both sexes). MCs are a prominent IN  
38 subclass inhibiting the distal portion of PN apical dendrites, thus controlling dendrite electrogenesis  
39 and synaptic integration. Yet, it is poorly understood whether MCs inhibit other elements of the  
40 cortical circuits, and the connectivity properties with non-PN targets are unknown. We found that  
41 MCs have a strong preference for PN dendrites, but they also considerably connect with parvalbumin  
42 (PV)-positive, vasoactive intestinal peptide (VIP)-expressing and layer 1 (L1) INs. Remarkably,  
43 GABAergic synapses from MCs exhibited clear cell-type-specific short-term plasticity. Moreover,  
44 whereas the biophysical properties of MC-PN synapses were consistent with distal dendritic inhibition,  
45 MC-IN synapses exhibited characteristics of fast perisomatic inhibition. Finally, MC-PN connections  
46 used  $\alpha 5$ -containing GABA<sub>A</sub>Rs, but this subunit was not expressed by the other INs targeted by MCs.  
47 We reveal a specialized connectivity blueprint of MCs within different elements of superficial cortical  
48 layers. In addition, our results identify  $\alpha 5$ -GABA<sub>A</sub>Rs as the molecular fingerprint of MC-PN dendritic  
49 inhibition. This is of critical importance, given the role of  $\alpha 5$ -GABA<sub>A</sub>Rs in cognitive performance and  
50 their involvement in several brain diseases.

51

## 52 **Significance statement**

53 Martinotti cells (MCs) are a prominent subclass of SST-expressing GABAergic INs, specialized in  
54 controlling distal dendrites of PNs and taking part in several cognitive functions. Here we characterize  
55 the connectivity pattern of MCs with other INs in the superficial layers (L1 and L2/3) of the mouse

56 barrel cortex. We found that the connectivity pattern of MCs with PNs as well as PV, VIP and L1 INs  
57 exhibit target-specific plasticity and biophysical properties. The stark specificity of  $\alpha 5$ -GABA<sub>A</sub>Rs at MC-  
58 PN synapses, and the lack of functional expression of this subunit by other cell types, define the  
59 molecular identity of MC-PN connections and the exclusive involvement of this outstanding inhibitory  
60 circuits in  $\alpha 5$ -dependent cognitive tasks.

61

## 62 Introduction

63 In the neocortex, fast synaptic inhibition underlie important cognitive-relevant activity (Buzsáki,  
64 2010; Isaacson and Scanziani, 2011). Neocortical inhibition is provided by GABAergic interneurons,  
65 which are highly heterogeneous and connect with both principal pyramidal neurons (PNs) and other  
66 inhibitory cells in a very stereotyped manner. Some interneurons, such as parvalbumin (PV)-  
67 expressing basket cells, innervate the perisomatic region of cortical PNs, and they thus provide a tight  
68 temporal control of PN spiking output and drive cognition-relevant fast network oscillations, especially  
69 in the  $\beta$ - $\gamma$ -frequency range (20-100 Hz)(Bartos et al., 2007; Buzsáki and Wang, 2012).

70 Conversely, other interneuron types, such as those expressing the neuropeptide somatostatin  
71 (SST), were shown to target dendrites of PNs, thereby controlling dendritic electrogenesis, non-linear  
72 integration and glutamatergic synaptic input (Wang et al., 2004; Lovett-Barron et al., 2012; Wilson et  
73 al., 2012; Schulz et al., 2018). In sensory cortices, SST interneurons were shown to be involved in lateral  
74 inhibition, playing a major role in key sensory computations, such as surround suppression (Kapfer et  
75 al., 2007; Silberberg and Markram, 2007; Berger et al., 2009; Adesnik and Scanziani, 2010; Adesnik et  
76 al., 2012). Moreover, SST-operated dendritic inhibition was shown to encode fear memory and  
77 affective behavior in prefrontal cortex (Xu et al., 2013; Scheggia et al., 2019; Clem and Cummings,  
78 2020).

79 SST INs were proposed to be the source of a profuse ‘blanket’ of inhibition due to their dense  
80 connectivity with PNs (Fino and Yuste, 2011). However, this view neglects the diversity of SST-positive  
81 INs (Gouwens et al., 2020), and the fact that they preferentially contact specific PN subclasses  
82 (Hilscher et al., 2016) as well as other inhibitory neurons (Pfeffer et al., 2013; Tremblay et al., 2016).  
83 In particular, SST interneurons can be classified as Martinotti cells (MCs) and non-Martinotti cells,  
84 which exhibit differential connectivity patterns as well as specific molecular profiles (Wang et al., 2004;  
85 Ma et al., 2006; Tremblay et al., 2016; Yavorska and Wehr, 2016; Paul et al., 2017; Scala et al., 2019).  
86 In particular, MCs exhibit a well-defined axonal morphology, as they project their axons to layer 1,

87 where they extensively inhibit the most distal dendritic tufts of PNs (Wang et al., 2004; Ma et al., 2006;  
88 Kapfer et al., 2007; Silberberg and Markram, 2007; Tremblay et al., 2016). Functionally, MCs are  
89 efficiently recruited by local PNs with loose-coupled, strongly facilitating synapses (Reyes et al., 1998;  
90 Wang et al., 2004; Kapfer et al., 2007; Silberberg and Markram, 2007), and are quasi-preferentially  
91 inhibited by vasoactive intestinal peptide (VIP)-expressing GABAergic interneurons (Pfeffer et al.,  
92 2013; Karnani et al., 2016; Tremblay et al., 2016; Walker et al., 2016). Finally, MCs form synapses with  
93 other elements of the cortical circuit, namely other inhibitory interneurons (Ma et al., 2006; Pfeffer et  
94 al., 2013). However, the actual extent and biophysical properties of these disinhibitory circuits are  
95 unknown and/or generalized over SST-expressing MCs and nMCs (Pfeffer et al., 2013).

96 Importantly, MC-PN inhibitory synapses were shown to use the  $\alpha 5$ -containing GABA<sub>A</sub>R ( $\alpha 5$ -  
97 GABA<sub>A</sub>Rs) (Ali and Thomson, 2008; Zorrilla de San Martin et al., 2020). Similarly, the hippocampal  
98 counterparts of MCs, the oriens-lacunosum moleculare (O-LM) interneurons express functional  $\alpha 5$ -  
99 GABA<sub>A</sub>Rs (Schulz et al., 2018). This prompts the question whether GABAergic synapses formed by MCs  
100 onto other elements of the cortical circuit use this specific subunit of GABA<sub>A</sub>Rs. Understanding the  
101 actual synaptic circuits relying on the  $\alpha 5$  subunit has important clinical implications. Indeed,  $\alpha 5$ -  
102 GABA<sub>A</sub>Rs were indicated as a prominent target for therapeutic interventions for cognitive dysfunctions  
103 in Down syndrome (Braudeau et al., 2011; Duchon et al., 2019; Schulz et al., 2019; Zorrilla de San  
104 Martin et al., 2020), depression (Zanos et al., 2017), anesthesia-induced memory impairment (Zurek  
105 et al., 2014) and schizophrenia (Duncan et al., 2010; Gill and Grace, 2014).

106 Here we investigated the connectivity blueprint of MCs in the superficial layers of the mouse barrel  
107 cortex. We found that, in addition to the known connectivity with PN distal dendrites, MCs connect  
108 extensively also with PV, VIP and L1 INs, but not with other MCs. Interestingly, GABAergic synapses  
109 formed by MCs exhibited clear target specificity of short-term plasticity. Finally, dendritic inhibition  
110 using  $\alpha 5$ -GABA<sub>A</sub>Rs is a peculiarity of MC-PN synapses, as unitary responses from MCs to other INs  
111 exhibited fast (<1ms) rise-time, and they were not modulated by a  $\alpha 5$  negative allosteric modulator  
112 (NAM).

113 Altogether, these results indicate the molecular, connectivity and biophysical fingerprint used by  
114 MCs for inhibitory synapses that they make with PNs and other elements of the cortical circuit.

115

## 116 **Materials and Methods**

### 117 **Animals**

118 Experimental procedures followed national and European (2010/63/EU) guidelines and have been  
119 approved by the author's institutional review boards and national authorities (APAFIS #2599). All  
120 efforts were made to minimize suffering and reduce the number of animals. Mice used in this study  
121 were of both sexes. In order to identify GABAergic transmission from different INs we used several  
122 mouse models. To record from PV INs we initially used *Pvalb*-cre mice (Jackson Laboratory, Stock  
123 Number: 008069), crossed with a mouse line, which expresses a *loxP*-flanked STOP cassette and giving  
124 robust tdTomato fluorescence following Cre-mediated recombination (Jackson Laboratory Stock  
125 Number 007909). In the experiments illustrated in Figs. 2,3,5 and 6, we used PVAlbTomato mouse line  
126 (Kaiser et al., 2016, Jackson Stock# 27395), a line that expresses TdTomato fluorescent protein  
127 specifically in PV INs. To record from MCs, we used GAD-67 GFP X98 mice (Ma et al., 2006), herein  
128 defined as X98. These mice express EGFP in a specific subset of GABAergic cells (Jackson Laboratory  
129 Stock# 006340). To perform simultaneous recordings from MCs and PV INs we crossed X98 mice with  
130 PvAlb-tdtomato. Furthermore, in order to record from synaptically connected VIP INs and MCs we  
131 crossed VIP-Cre mice (Jackson Laboratory Stock #010908) with X98 mice and infected newborns with  
132 viral vectors carrying the genes of either Chr2 or TdTomato (see below details of different viral  
133 infections).

### 134 **In Vitro Slice Preparation and Electrophysiology**

135 Coronal slices (300-350  $\mu$ m thick) from somatosensory cortex were obtained from 18- to 25-d-old  
136 mice. Animals were deeply anesthetized with isoflurane and decapitated. Brains were quickly

137 removed and immersed in “cutting” solution (4°C) containing the following (in mM): 126 choline, 11  
138 glucose, 26 NaHCO<sub>3</sub>, 2.5 KCl, 1.25 NaH<sub>2</sub>PO<sub>4</sub>, 7 MgSO<sub>4</sub> and 0.5 CaCl<sub>2</sub> (equilibrated with 95-5% O<sub>2</sub>-CO<sub>2</sub>,  
139 respectively). Slices were cut with a vibratome (Leica) in the same cutting solution and then incubated  
140 in oxygenated artificial cerebrospinal fluid (aCSF) containing the following (in mM): 126 NaCl, 2.5 KCl,  
141 2 CaCl<sub>2</sub>, 1 MgSO<sub>4</sub>, 1.25 mM NaH<sub>2</sub>PO<sub>4</sub>, 26 mM NaHCO<sub>3</sub>, and 16 mM glucose (pH 7.4), initially at 34°C for  
142 30 min, and subsequently at room temperature until transfer to the recording chamber. Recordings  
143 were obtained at 32-34°C. Whole-cell voltage-clamp recordings were performed in from layer (L)2/3  
144 PNs, MCs, PV, VIP INs and L1 INs of the primary somatosensory cortex. PNs were visually identified  
145 using infrared video microscopy by their large somata and pia-oriented apical dendrites. L1 INs were  
146 also visually identified with transmitted light only as they are the only cell type with the soma present  
147 in L1. MCs (labeled with GFP, see Fig 1), VIP INs and PV INs (labeled with TdTomato), were identified  
148 using LED illumination (blue, λ=470nm, green λ=530nm, OptoLED system, Cairn Research, Faversham,  
149 UK) coupled to epifluorescent optical pathway of the microscope. Single or double voltage-clamp  
150 whole-cell recordings were made with borosilicate glass capillaries (with a tip resistance of 2–4 MΩ)  
151 filled with different intracellular solutions depending of the experiment. For unitary inhibitory  
152 postsynaptic currents (uIPSCs) the intracellular solution contained (in mM): 70 K-gluconate, 70 KCl, 10  
153 HEPES, 1 EGTA, 2 MgCl<sub>2</sub>, 4 Mg-ATP, 0.3 Na-GTP, pH adjusted to 7.2 with KOH, 280–300 mOsm or 145  
154 CsCl, 4.6 MgCl<sub>2</sub>, 10 HEPES, 1 EGTA, 0.1 CaCl<sub>2</sub>, 4 Na-ATP, 0.4 Na-GTP, pH adjusted to 7.2 with CsOH,  
155 280–300 mOsm. To confirm the GABAergic nature of uIPSCs, gabazine (10 μM) was added to the aCSF  
156 at the end in some experiments. For tonic inhibition experiments, GABA (5 μM) was added to the aCSF.  
157 To record unitary excitatory postsynaptic currents (uEPSCs) from INs, a low chloride intracellular  
158 solution was used and DNQX was omitted in the aCSF superfusate. In these experiments, the  
159 intracellular solution had the following composition (in mM): 150 K-gluconate, 4.6 MgCl<sub>2</sub>, 10 HEPES, 1  
160 EGTA, 0.1 CaCl<sub>2</sub>, 4 Na-ATP, 0.4 Na-GTP, pH adjusted to 7.2 with KOH, 280–300 mOsm. In voltage-clamp  
161 experiments, access resistance was on average <15 MΩ and monitored throughout the experiment.  
162 Recordings were discarded from analysis if the resistance changed by >20% over the course of the

163 experiment. Unitary synaptic responses were elicited in voltage-clamp mode by brief somatic  
164 depolarizing. A train of 5 presynaptic spikes at 50 Hz was applied to infer short-term plasticity of  
165 synaptic responses. The paired pulse ratio (PPR) was obtained as the peak amplitude of the second  
166 uEPSC divided by that of the first. In order to isolate GABA<sub>A</sub>-receptor-mediated currents, DNQX (10  
167  $\mu$ M) was present in the superfusate of all experiments, unless otherwise indicated.

168 Signals were amplified, using a Multiclamp 700B patch-clamp amplifier (Molecular Devices, San  
169 Jose, CA), sampled at 20-100 kHz and low-pass filtered at 4 KHz (for voltage clamp experiments) and  
170 10 KHz (for current clamp experiments). All drugs were obtained from Tocris Cookson (Bristol, UK) or  
171 Sigma (Bristol, UK).  $\alpha$ 5IA, (3-(5-methylisoxazol-3-yl)-6-[(1-methyl-1,2,3-triazol-4-yl)methoxy]-1, 2, 4-  
172 triazolo[3, 4-a]phthalazine) also named L-822179 was synthesized by Orga-Link SARL (Magny-les-  
173 Hameaux, France) according to Sternfeld et al. (2004) as in Braudeau et al. (2011). The hydrochloride  
174 salt was solubilized in DMSO at a concentration of 1mM and then diluted in the appropriate buffer.

#### 175 **Virus-Mediated Gene Delivery and Optogenetics**

176 To study MC-VIP and VIP-MC synapses we first crossed crossed VIPcre with X98 mice and injected  
177 300 nL of a solution containing adeno-associated viral (AAV) particles into the somatosensory cortex  
178 of ice-anesthetized pups (P0–3) to selectively express TdTomato or Channelrhodopsin-2 (ChR2) in VIP  
179 INs. Injections were made with a beveled glass pipette 300  $\mu$ m deep in the somatosensory cortex  
180 through intact skin and skull. We then delivered the solution containing the AAVs using a Nanoliter  
181 2000 Injector (WPI Inc., USA). The pipette was left in place for an additional 30 s, before it was  
182 retracted. The AAVs expressed floxed ChR2 or TdTomato (AAV9.EF1.dfloxed.hChR2(H134R)-  
183 mCherry.WPRE.hGH; Addgene #20297 and pAAV-FLEX-tdTomato; Addgene #28306, respectively)  
184 purchased from the Penn Vector Core (University of Pennsylvania). At the end of the procedure, pups  
185 were returned to their mother. ChR2 activation was obtained by brief (0.5-2 ms) LED light pulses on  
186 cortical slices ( $\lambda$  = 470 nm). Experiments were performed using a 60X water immersion lens. Light-



187 evoked responses were recorded in L 2/3 MCs and were completely abolished by gabazine (not  
188 shown).

## 189 **Data analysis**

190 Experiments on firing dynamics, tonic currents and unitary paired recordings were analyzed with  
191 Clampfit (Molecular Devices), Origin (Microcal) and custom-made scripts in Matlab (the Mathworks).  
192 Spontaneous synaptic events were detected using custom written software (Wdetecta, courtesy J. R.  
193 Huguenard, Stanford University <https://hlab.stanford.edu/wdetecta.php>) based on an algorithm that  
194 calculates the derivative of the current trace to find events that cross a certain defined threshold.  
195 Amplitude and rise times of the events were then binned and sorted, using other custom written  
196 routines (courtesy J. R. Huguenard, Stanford University).

197 The peak-to-baseline decay phase of uIPSCs was fitted by the following double exponential  
198 function:

$$199 \quad F(t) = A_{fast} e^{\frac{-t}{\tau_{fast}}} + A_{slow} e^{\frac{-t}{\tau_{slow}}} \quad \text{Equation (1)}$$

200 where  $A_{fast}$  and  $A_{slow}$  are the fast and slow amplitude components, and  $\tau_{fast}$  and  $\tau_{slow}$  are the fast and  
201 slow decay time constants, respectively. The weighted decay time constant ( $\tau_{d,w}$ ) was calculated using  
202 the following equation:

$$203 \quad \tau_{d,w} = \frac{[(A_{fast} \cdot \tau_{fast}) + (A_{slow} \cdot \tau_{slow})]}{A_{fast} \cdot A_{slow}} \quad \text{Equation (2)}$$

204 The adaptation index was calculated as the last/first inter-spike interval ratio following a train of  
205 spikes induced by injection of a depolarizing step of current. Passive properties as well as synaptic  
206 currents were analyzed with Clampfit and custom-made scripts in MATLAB (Mathworks). Both unitary  
207 and light-induced IPSCs were averaged across at least 20 sweeps for each condition examined. Results  
208 are presented as means  $\pm$  SEM unless otherwise stated.

## 209 **Morphological reconstruction**

210 To reconstruct and quantify anatomical features of different cortical neurons, biocytin (Sigma) was  
211 included in the intracellular solution at a high concentration (10mg/mL), which required extensive  
212 sonication. To avoid excessive degradation of fragile molecules such as ATP, sonication was performed  
213 in an ice bath. The intracellular solution was then filtered twice to prevent the presence of undissolved  
214 lumps of biocytin in the patch pipette. Recordings lasted for at least 30 min. During that time, access  
215 resistance was continuously monitored throughout the experiment. At the end of recordings, the  
216 patch pipette was removed carefully to obtain an outside-out patch in order to reseal the cell properly.  
217 The slice was then left in the recording chamber for a further 5-10 min to allow biocytin diffusion.  
218 Slices were then fixed with 4% paraformaldehyde in phosphate buffer saline (PBS, Sigma) for at least  
219 48h. Following fixation, slices were incubated with the avidin-biotin complex (Vector Labs) and a high  
220 concentration of detergent (Triton-X100, 5%) for at least two days before staining with 3,3'-  
221 Diaminobenzidine (DAB, AbCam). Cells were then reconstructed, and cortical layers delimited using  
222 NeuroLucida (MBF Bioscience). Neuronal reconstructions were aligned to a mouse atlas from the Allen  
223 Institute. By using NeuroLucida Explorer, we analyzed the length of axons and dendrites of MCs in L2/3  
224 and L1 of somatosensory cortex. Data were exported and analyzed in OriginPro 2016 (OriginLab  
225 Corporation).

## 226 **Immunofluorescence**

227 Slices used for electrophysiology experiments were fixed overnight in 4% paraformaldehyde in  
228 phosphate buffered saline (PBS, pH 7.4) at 4°C. Slices were then rinsed three times at room  
229 temperature (10 min each time) in PBS and incubated overnight at 4°C in PB with 0.3% Triton X-1000,  
230 0.1% normal goat serum (NGS), anti-GFP antibody (host: rabbit, 1:400, AB3080, Millipore) and/or anti-  
231 SST antibody (host: mouse, 1:250, G10 sc-55565, Santa Cruz) and/or anti-DsRed (host: rabbit, 1/500,  
232 #632496 Takara Bio Clontech). Slices were then rinsed three times in PBS (10 min each) at room  
233 temperature and incubated with goat-hosted secondary antibodies coupled to different fluorophores:  
234 Alexa 488 (1:500, A11034, Life technologies) and Alexa 633 (1:500, A21052, Life technologies) for 2 h  
235 at room temperature. Slices were then rinsed three times in PBS (10 min each) at room temperature

236 and mounted with Fluoromount. Immunofluorescence was then images were acquired with a confocal  
237 microscope (Leica SP8).

238 Parvalbumin, SST and GFP staining on X98 mice were also performed on 50  $\mu$ m-thick slices. Briefly,  
239 mice were perfused with 0.9% NaCl solution containing Heparin and 4% paraformaldehyde (PFA).  
240 Brains were cryo-protected by placing them overnight in 30% sucrose solution and then frozen in  
241 Isopentane at a temperature  $<-50^{\circ}\text{C}$ . Brains were sliced with a freezing microtome (ThermoFisher  
242 HM450). Permeabilization in a blocking solution of PBT with 0.3% Triton and 10% Normal Goat Serum  
243 was done at room temperature for 2 hr. Slices were then incubated overnight ( $4^{\circ}\text{C}$ ) in the same  
244 blocking solution containing the primary rabbit anti-PV antibody (1:1000; Thermo Scientific, PA1-933)  
245 and mouse anti-GFP antibody (1:500; Milipore MAB3580). Slices were then rinsed three times in PBS  
246 (10 min each) at room temperature and incubated with goat anti-rabbit and a goat anti-mouse  
247 antibody (1:500; Jackson IR) coupled to Alexa-488 or 633 for 3.5 hr at room temperature. Slices were  
248 then rinsed three times in PBS (10 min each) at room temperature and coverslipped in mounting  
249 medium (Fluoromount, Sigma Aldrich F4680). Immunofluorescence images were acquired with a  
250 confocal (Leica SP8) or epifluorescence (Zeiss Apotome 3) microscope.

## 251 **Statistical Analysis**

252 All statistical analysis were performed in Origin (Microcal). Normality of the data was systematically  
253 assessed (Shapiro-Wilk normality test). Normal distributions were statistically compared using Paired  
254 t-Test or Two-sample t-Test. When data distributions were not normal or n was small, non-parametric  
255 tests were performed (Mann-Whitney, Wilcoxon Signed Ranks Test). Two-way ANOVA tests were  
256 followed by Bonferroni's multiple comparison post hoc. Differences were considered significant if p  
257  $<0.05$  (\* $p<0.05$ , \*\* $p<0.01$ , \*\*\* $p<0.001$ ).

258

## 259 **Results**

### 260 **The X98 mouse is a reliable model to specifically study L2/3 Martinotti cells**

261 Despite being broadly classified as dendrite-targeting INs, SST-expressing cells exhibit significant  
262 electrophysiological, anatomical, connectivity and molecular heterogeneity (Ma et al., 2006; Paul et  
263 al., 2017; Naka et al., 2019). In order to specifically study the connectivity of L2/3 MCs we searched  
264 for a suitable mouse line. X98 mice express GFP predominantly in cortical layers (L) 5B and 6, and, to  
265 a lesser extent, in L2/3 (Ma et al., 2006). A detailed characterization of these mice showed that GFP is  
266 specifically expressed in L5 MCs (Ma et al., 2006). However, although there is prominent fluorescence  
267 in L2/3, GFP-expressing cells in this cortical layer were not analyzed. Therefore, we first set out to  
268 confirm that GFP-expressing cells in L2/3 belong to the specific SST-positive interneuron subtype  
269 defined as the MCs. We performed immunofluorescence staining on microtome-cut sections from X98  
270 coronal somatosensory slices of 18-25-days-old mice and showed that all GFP-expressing cells also  
271 expressed SST while some SST-positive cells did not express GFP (Fig. 1 A). In another series of  
272 experiments, several GFP-expressing neurons were filled with biocytin during whole-cell recordings  
273 and their morphology was traced to assess somato-dendritic and axonal morphology. Axons of L2/3  
274 GFP-expressing neurons were systematically oriented towards superficial layers and consistently  
275 reached L1 where they were profusely branched (red tracing in Fig. 1 B and C;  $p=4.4e^{-4}$ , One-way  
276 ANOVA followed by Bonferroni post-hoc test,  $F=7.4716$ ,  $n=11$  reconstructed GFP-positive neurons).  
277 Conversely, GFP-expressing neurons dendrites were mostly located in L2/3 without reaching L1 (blue  
278 tracing in Fig. 1 B and C). We then assessed the excitability and passive properties of GFP-expressing  
279 neurons ( $n=22$ ) and compared their firing pattern with that of PV INs, the most abundant and perhaps  
280 best characterized GABAergic neuronal subtype (Fig 1 D). As previously described, the majority of the  
281 GFP-positive cells in X98 mice displayed a characteristic sag in response to hyperpolarizing current  
282 injection and a highly adapting firing behavior when depolarizing currents triggered repetitive spiking  
283 (Fig 1 D). Conversely, PV INs displayed fast-spiking, non-adapting pattern in response to depolarizing

284 currents (adaptation index:  $2.27 \pm 0.17$  and  $1.07 \pm 0.04$  for GFP-expressing and PV INs, respectively;  
285  $p=1.1e^{-5}$ , Mann-Whitney U test; Fig. 1 D), more hyperpolarized resting membrane potential ( $V_m$ :  $-66 \pm$   
286  $1$  and  $-71 \pm 1$  mV for GFP-expressing and PV INs, respectively;  $p=0.0017$ , unpaired T test) and lower  
287 input resistance ( $R_i$ :  $189 \pm 11$  and  $92 \pm 10$  M $\Omega$  for GFP-expressing and PV INs, respectively;  $p=8.1e^{-6}$ ,  
288 Mann-Whitney U test; Fig. 1 E).

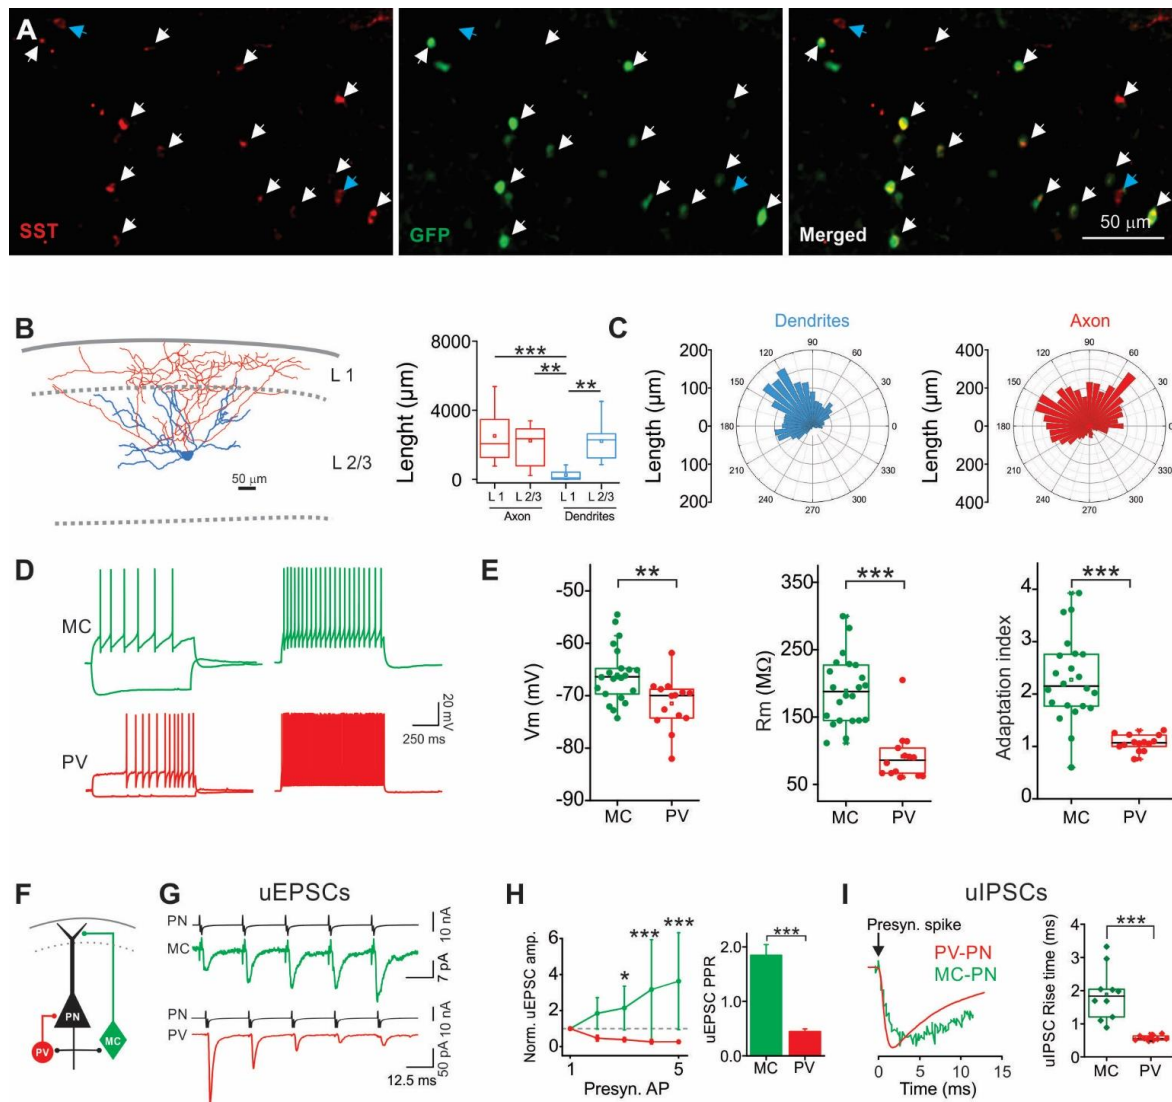

**Figure 1: GFP-positive neurons in X98 mice are SST-expressing MCs.**

**A**: Top: Epifluorescence micrograph of a dual immune-staining against SST (red) and GFP (green) in X98 coronal somatosensory slices. White arrows: GFP and SST co-localization; blue arrows: cells expressing SST only. **B**: Left: representative morphological reconstruction of a GFP-positive neuron filled with biocytin. Blue: dendrites; red: axons. Right: Population data of axon (red) and dendrite (blue) lengths distribution in L1 and L2/3 (n=11). **C**: Axonal (red) and dendritic polar plots of the cell of B. **D**: Representative current-clamp recordings from a GFP-expressing interneuron in X98 mice (green) and a PV cell (red). X98 GFP cells display a characteristic sag in response to hyperpolarizing current injection and a highly adapting firing behavior. Conversely, PV-cells show fast-spiking patterns in response to depolarizing current injections. **E**: Summary graphs of resting membrane potential (left), membrane resistance (middle) and adaptation index (right) in PV interneurons (n=14) and MCs (n=22). **F**: Schematic of mutually connected MC-PN and PV-PN pairs. **G**: Representative averaged voltage clamp trace of unitary EPSCs stimulated by 5 action potentials at 40Hz in a PN and recorded in a GFP-positive cell from a X98 mouse (green, upper panel), and in a PV-cell (bottom panel). **H**: Left panel: pooled normalized amplitudes of uEPSC evoked with a 50Hz, 5 AP train. Right: population plot of paired-pulse ratio (PPR) of X98 GFP (n=20, green) and PV-INs (n=11, red). **I**: Left: overlapped representative uIPSCs elicited by MCs (green) and PV-INs (red) recorded PNs. Right: population plot of the uIPSC mean rise time from MC to PN (green) and PV to PN (red) synapses. \* p<0.05, \*\* p<0.01, \*\*\* p<0.001.

290 We then assessed the biophysical and pharmacological traits of synaptic transmission that  
291 distinguish MCs from other INs. We analyzed unitary glutamatergic, excitatory and GABAergic,  
292 inhibitory currents (uEPSCs and uIPSCs, correspondingly) onto and from putative MCs in MC-PN  
293 connected pairs. One hallmark of MC connectivity is the strongly facilitating glutamatergic synaptic  
294 responses evoked upon PN action potentials (Wang et al., 2004; Kapfer et al., 2007; Silberberg and  
295 Markram, 2007). Accordingly, we found that unitary excitatory inputs from PNs to putative MCs in X98  
296 mice were invariably facilitating while uEPSCs onto PV INs were depressing (paired pulse ratio:  $1.8 \pm$   
297  $0.2$  for GFP-expressing neurons and  $0.4 \pm 0.1$  for PV INs;  $p=1.8e^{-6}$ , Mann-Whitney U test; Fig 1 F-H).  
298 Finally, we analyzed the kinetics of uIPSCs elicited by MCs and PV-cells in L2/3 PNs known to have  
299 distinctive kinetics (Silberberg et al., 2007). We found that uIPSCs evoked from MCs had significantly  
300 slower rise times as compared to PV INs (Rise time:  $1.89 \pm 0.25$  ms for GFP-expressing neurons and  
301  $0.57 \pm 0.02$  for PV INs;  $p=2.2e^{-5}$ , unpaired T test; Fig. 1 I), consistent with characteristic MC-mediated  
302 dendritic uIPSCs.

303 Altogether, these results indicate that GFP-expressing neurons in L2/3 of the somatosensory cortex  
304 of X98 mice are a homogeneous subgroup of MCs as they exhibit typical anatomical, intrinsic  
305 excitability and synaptic features of MCs. Furthermore, this subgroup can be readily distinguished  
306 from the most abundant GABAergic PV INs.

### 307 **Martinotti Cells display target-specific synaptic properties**

308 In addition to PNs, SST INs were shown to contact other inhibitory neurons of the cortical  
309 microcircuits including VIP, PV and L1 INs (Pfeffer et al., 2013; Tremblay et al., 2016). However, it  
310 remains unknown whether this is true for MCs and whether these connections exhibit the biophysical  
311 and pharmacological properties observed in the inhibitory MC-PN synapse. In order to address this  
312 question, we systematically evoked uIPSCs from specific synapses formed between MCs and other INs  
313 using dual patch recordings in brain slices. To measure and compare evoked uIPSCs from pairs  
314 between MCs and other INs, we used brain slices containing differently labeled IN subtypes. For MC-

315 PV synapses, we crossed X98 mice with *Pvalb*-tdTomato mice. For MC-L1 synapses, we used X98 mice  
316 and L1 INs were identified by their localization in L1. Finally, to record uIPSCs from MC-VIP cell pairs  
317 we crossed VIPcre with X98 mice. Mouse pups (P1-3) were then subjected to intracerebral injections  
318 of flexed AAV particles coding for tdTomato. We could thus obtain mice, in which MCs and VIP cells  
319 were simultaneously labeled with GFP and tdTomato, respectively.

320 We found significant connectivity rates between MCs and PV INs (13 connected out of 85 recorded  
321 pairs), between MCs and L1 INs (11 connected out of 80 recorded pairs) and between MC and VIP INs  
322 (9 connected out of 45 recorded pairs; Fig. 2 B). Yet, the connectivity rate between MCs and these IN  
323 types was much lower than functional connections with PNs (30 connected out of 57 recorded pairs).  
324 Conversely, we did not find functional synaptic transmission between MCs (0 out of 10,  
325 connected/recorded pairs; Fig 2 B). Amplitudes of evoked uIPSCs were also largely variable between  
326 and within synapses. uIPSC amplitudes were consistently larger in MC-IN than in MC-PN synapses  
327 (uIPSC amplitudes:  $10 \pm 1$ ;  $36 \pm 4$ ;  $72 \pm 32$ ;  $172 \pm 70$  pA; MC-PN, -PV, L1 and VIP INs, respectively;  
328 Kruskal Wallis followed by Mann-Whitney with Bonferroni's correction;  $n = 10, 7, 5, 6$ , respectively).

329 GABAergic synapses formed by MCs to PNs are slow due to their distal dendritic location and  
330 consequent electrotonic filtering. To further explore whether synaptic contacts made by MCs onto  
331 other circuit elements followed a similar pattern, we compared the kinetics of uIPSCs elicited by MCs  
332 onto PNs, PV-, L1-and VIP-INs (Fig. 2 C-F). Rise time (Rt) of MC-PN uIPSCs were significantly slower  
333 than those recorded from MC-PV, MC-L1 and MC-VIP-IN pairs ( $1.89 \pm 0.25$ ;  $0.73 \pm 0.10$ ;  $0.63 \pm 0.13$ ;  
334  $0.80 \pm 0.15$  ms, respectively;  $p=1.5e^{-4}$ , one-way ANOVA;  $n = 10, 7, 5, 6$ , respectively; Fig 2 C-F). Rise  
335 times of uIPSCs recorded from connected pairs between MCs and PV, VIP and L1 INs were not  
336 significantly different (one-way ANOVA followed by Bonferroni post hoc test).

337



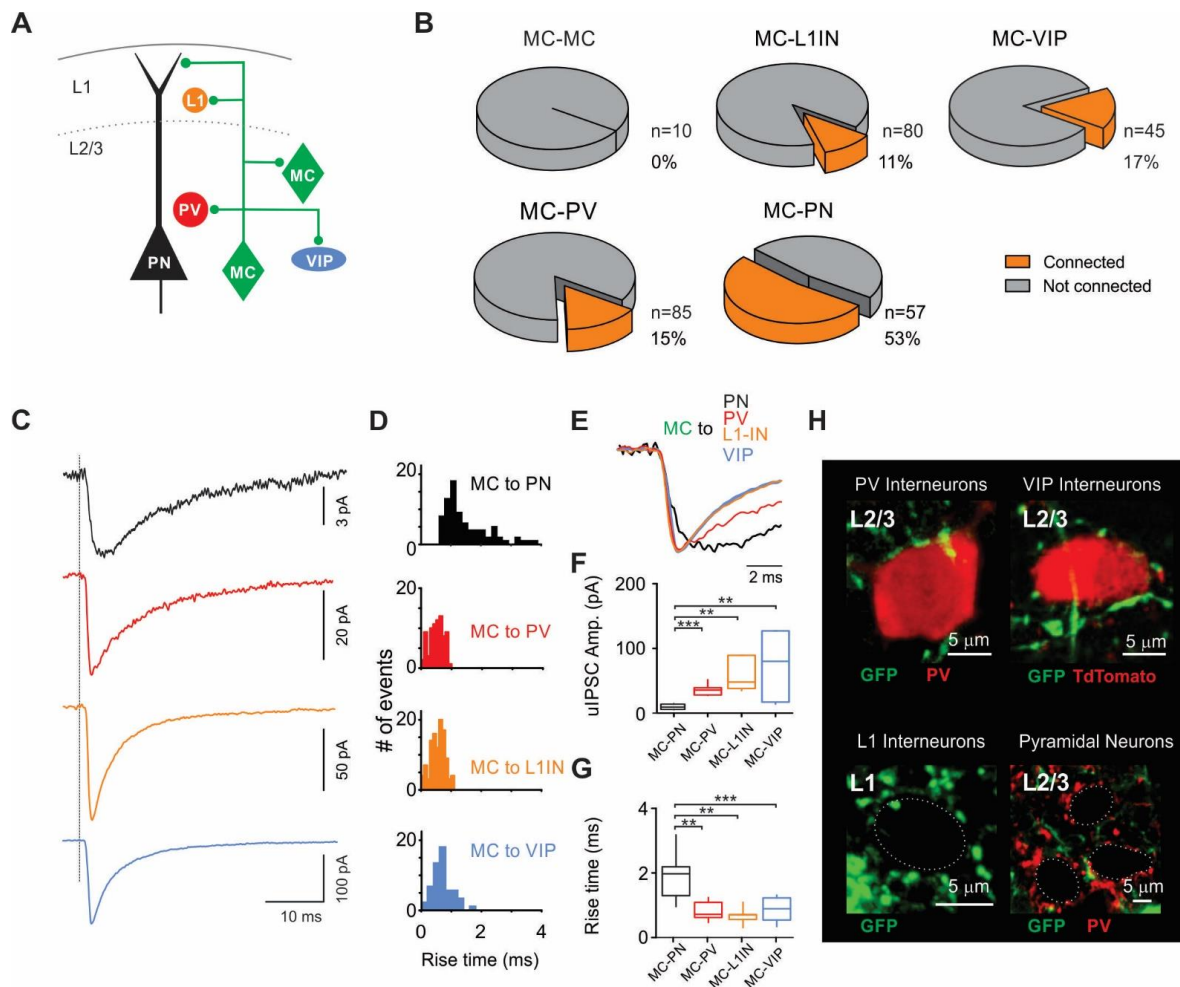

**Figure 2: Diversity of MC synaptic contacts onto different neuronal types in the L2/3 of somatosensory cortex.**

**A:** Schematic representation of the tested inhibitory connections involving MCs. **B:** Pie charts illustrating the connectivity rates. **C:** Representative voltage-clamp uIPSCs average traces from MC-PN (black), MC-PV-IN (red) and MC-L1 IN (orange), VIP-INs (blue). Gray dotted line represents the time of the peak of presynaptic action potentials. **D:** Representative distributions of uIPSCs Rt recorded from individual MC-PN (top, black), MC-PV-IN (middle, red) and MC-L1 (bottom, orange) connections. **E:** uIPSC (same as in C) normalized to the peak. **F:** Mean uIPSC amplitudes. **G:** Population plot of the mean uIPSCs Rts from individual MC-PN, MC-PV, MC-L1, PV-PN and MC-VIP recorded connections. **H:** Confocal micrographs illustrating immunolabelling of: GFP-expressing MC puncta and PV (top left), GFP-expressing MC puncta and TdTomato-expressing VIP-IN (top right), GFP-expressing MC puncta around L1 IN soma (bottom left), GFP-expressing MC puncta and PV-positive synaptic baskets formed around L2/3 PN somas (bottom right). \*\*  $p < 0.01$ , \*\*\*  $p < 0.001$ .

338

339 One possible explanation for the different uIPSC kinetics observed at inhibitory synapses made by

340 MCs could be that synaptic inputs located in the somatic/perisomatic region are less filtered than

341 those located in distal dendrites. Therefore, we took advantage of the fluorescent labeling strategies

342 to analyze putative contacts between GFP-positive MC axons and the somatic compartment of PV-,

343 L1- or VIP-INs. Analysis of confocal images revealed GFP-positive MC axons and bona fide boutons  
 344 juxtaposed to PV-IN somas and to VIP-INs in L2/3 (Fig 2H). Moreover, in L1 we also found L1 IN somas  
 345 circled by GFP-positive MC bona fide puncta (Fig 2 G). Conversely, PN somas in L2/3 were profusely  
 346 surrounded by PV-positive puncta but almost no GFP-positive puncta from MCs. Although indirect,  
 347 this evidence suggests that MCs make axo-somatic connections onto other INs while they make  
 348 exclusively axo-dendritic connections onto PNs.

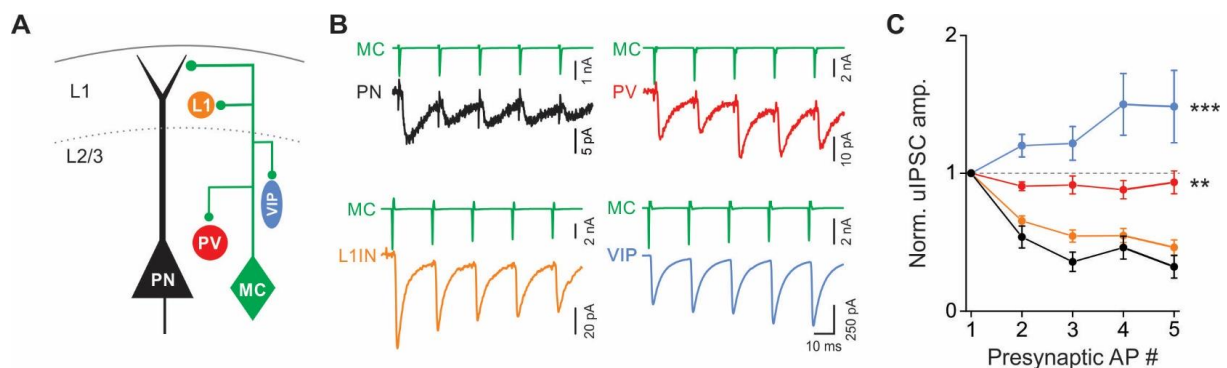

**Figure 3: Plasticity of MC-mediated synaptic inhibition in L2/3 of somatosensory cortex.**

**A:** Schematic representation of the tested inhibitory circuits involving MCs. **B:** Representative voltage-clamp averaged traces of uIPSCs from MCs onto PNs (black), PV-cells (red), L1-INs (orange) and VIP-INs (blue). **C:** Normalized uIPSC amplitude elicited by MCs onto different elements of the L2/3 inhibitory circuit. Inhibition of MCs onto PN (black) and L1-INs (orange) is strongly depressing whereas connections onto VIP (blue) are facilitating. A slight facilitation occurs at MC-PV synapses.

349

350 We then analyzed short-term synaptic plasticity (STP) at all unitary connections made by MCs with  
 351 different postsynaptic targets (Fig. 3A), in response to trains of 5 action potentials at 50 Hz. We found  
 352 that short-term plasticity profiles depended on the postsynaptic target. Indeed, GABAergic  
 353 transmission at MC-PN and MC-L1 IN synapses were strongly depressing. In contrast, MC-PV uIPSCs  
 354 did not vary during the stimulus train, and MC-VIP synapse exhibited a significant facilitating profile  
 355 (Fig. 3B-C). When compared with MC-PN connections, STP at MC-L1 IN synapses were not significantly  
 356 different. However, STP of MC-PV and MC-VIP IN synapses was significantly different than MC-PN  
 357 connections (repeated measures, two-way ANOVA followed by Bonferroni post hoc test;  $F=24.1516$ ,  
 358  $p=7.34e^{-5}$ ,  $n=5, 7, 5$  and  $7$  synapses for MC-VIP, -PV, -L1 and -PN, respectively; Fig. 3 B-C).

359 Altogether, these results indicate that L2/3 MCs preferentially contact PNs, to a lesser, albeit non-  
360 negligible, extent PV, VIP and L1 INs, and avoid connecting between themselves. MC-dendrite  
361 targeting is specific for connections with PNs. Surprisingly, short-term plasticity at MC-synapses  
362 exhibit clear target specificity.

363

### 364 **$\alpha$ 5-GABA<sub>A</sub>Rs define MC-PN synapses in L2/3 of mouse somatosensory cortex**

365 MC-PN synapse has been shown to be mediated by GABA<sub>A</sub>Rs containing the  $\alpha$ 5 subunit in the rat  
366 somatosensory cortex (Ali and Thomson, 2008), in the mouse prefrontal cortex (Zorrilla de San Martin  
367 et al., 2020) and in the SST-expressing, Oriens Lacunosum-Moleculare (OL-M) INs to PN synapse  
368 (Schulz et al., 2018). Furthermore, in the rat somatosensory cortex, PV-IN-mediated PN perisomatic  
369 inhibition is sensitive to zolpidem (100 nM), a positive allosteric modulator, which at this  
370 concentration, is known to specifically bind the benzodiazepine site of  $\alpha$ 1-containing and, less  
371 efficiently,  $\alpha$ 2- and  $\alpha$ 3-containing GABA<sub>A</sub> receptors (Korpi et al., 2002; Möhler, 2002; Bacci et al., 2003).  
372 In order to validate these results in the mouse somatosensory cortex we tested the effects of  $\alpha$ 5IA, a  
373 negative allosteric modulator (NAM) specific for  $\alpha$ 5-GABA<sub>A</sub>Rs (Dawson et al., 2006), and zolpidem on  
374 both MC-mediated PN dendritic inhibition and PV-IN-mediated PN perisomatic inhibition (Fig 4 A). PV-  
375 PN uIPSC weighted decay time constant ( $\tau_{d,w}$ ) was significantly increased by zolpidem (control:  $9.0 \pm$   
376  $1.3$  ms; zolpidem:  $11.2 \pm 0.7$  ms,  $n=6$  pairs,  $p=0.014$ , Paired t-test; Fig 4 B). In contrast, PV-PN uIPSCs  
377 amplitude was unaffected by  $\alpha$ 5IA (control:  $63 \pm 22$  pA;  $\alpha$ 5IA:  $65 \pm 20$  pA,  $n=6$  pairs,  $p=0.7294$ , Paired  
378 t-test; Fig. 4 B). The amplitude of uIPSCs elicited from MCs were highly sensitive to  $\alpha$ 5IA (control:  $177$   
379  $\pm 44$  pA;  $\alpha$ 5IA:  $104 \pm 23$  pA,  $n=11$  pairs;  $p=0.003$ , Wilcoxon Signed-Ranks test; Fig 4 C), and zolpidem  
380 did not affect the weighted decay time constant of the MC-PN uIPSCs (control:  $8.2 \pm 1.2$  ms; zolpidem:  
381  $9.1 \pm 0.9$ ,  $n=6$  pairs,  $p=0.173$ , paired T test, Fig 4 C). Importantly,  $\alpha$ 5IA is a partial NAM displaying  $\sim 40\%$   
382 efficacy, thus not providing a complete blockade of  $\alpha$ 5-GABA<sub>A</sub>Rs (Dawson et al., 2006). Importantly,

383 after incubation with  $\alpha 5$ IA, the remaining MC-PN uIPSC amplitude was near 60% ( $65.7\% \pm 5.4\%$ ; Fig. 4  
384 C). This suggests that unitary synaptic responses from MCs to PNs are fully mediated by  $\alpha 5$ -GABA<sub>A</sub>Rs.

385  $\alpha 5$ -GABA<sub>A</sub>Rs have been hypothesized to be extrasynaptic, mainly mediating tonic inhibition  
386 (Caraiscos et al., 2004). However, there is growing evidence that  $\alpha 5$ -GABA<sub>A</sub>R are also involved in  
387 dendritic inhibition at specific synapses made by MCs in the cortex and by OLM interneurons in the  
388 hippocampus (Ali and Thomson, 2008; Schulz et al., 2018; Zorrilla de San Martin et al., 2020). It is  
389 possible that sensitivity of uIPSCs to  $\alpha 5$ IA could be partially or fully due to activation of extrasynaptic  
390 GABA<sub>A</sub>Rs due to GABA spillover, induced by AP-evoked synaptic transmission. To further study the  
391 role of synaptic  $\alpha 5$ -GABA<sub>A</sub>Rs, we measured spontaneous inhibitory postsynaptic currents (sIPSCs)  
392 recorded from PNs (Fig 4 D-F). Because quantal, AP-independent synaptic events make up a large  
393 fraction of sIPSCs, these are less likely shaped by activation of extrasynaptic receptors. To separate  
394 putative dendritic and perisomatic events, we sorted sIPSCs into two groups based on their rise-times  
395 (Fig 4 D-F). We considered the events with rise times larger than 1.8 ms as 'slow', whereas those with  
396 rise-times smaller than 1.8 ms were defined as 'fast', based on the average rise-time obtained at  
397 connected MC-PN pairs (Figs. 1I; 2C-E). The amplitudes of slow sIPSCs were significantly reduced after  
398 10 minutes incubation with 100 nM  $\alpha 5$ IA (control:  $31 \pm 2$  pA,  $\alpha 5$ IA:  $28 \pm 1$  pA, n=11 cells, p=0.03,  
399 Wilcoxon Signed-Ranks test; Fig. 4 E). Conversely, the same concentration of  $\alpha 5$ IA did not affect fast  
400 sIPSCs amplitude (control:  $38 \pm 2$  pA,  $\alpha 5$ IA:  $36 \pm 2$  pA; n=11 cells, p=0.3636, Wilcoxon Signed-Ranks  
401 test; Fig 4 E). This result indicates that fast, perisomatic events are generated by other interneurons  
402 types, not using  $\alpha 5$ -GABA<sub>A</sub>Rs.

403 Altogether, these results indicate that synapses formed by dendrite-targeting MCs onto PNs,  
404 specifically express  $\alpha 5$ -GABA<sub>A</sub>Rs whereas PV-PN synapses express  $\alpha 1$ -GABA<sub>A</sub>Rs.

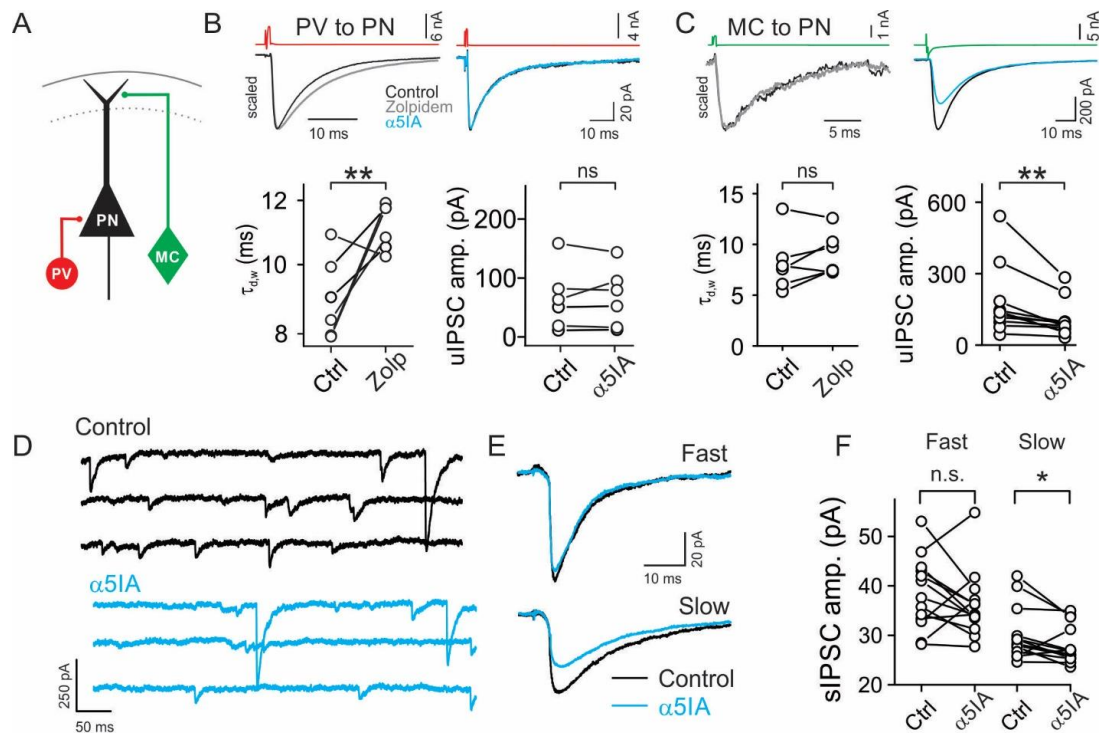

**Figure 4:  $\alpha 5$ -GABA<sub>A</sub>Rs mediate synaptic inhibition selectively from MCs.**

**A:** Schematic of paired recordings between a MC or PV-IN and a PN. **B:** Top left, Representative average uIPSC elicited by a PV-INs onto a PN in the absence (black) and presence (grey) of zolpidem. Traces are scaled to highlight zolpidem effect on uIPSC decay time. Bottom left, population data of zolpidem effect on the weighted decay time constant ( $\tau_{d,w}$ , left) and  $\alpha 5IA$  effect on uIPSC amplitude in PV-PN pairs. Top right: representative average uIPSC traces elicited a PV cell onto a PN in the absence (black) and presence (blue) of  $\alpha 5IA$ . **C:** Same as in B for MC-PN pairs. **D:** Representative voltage-clamp traces of sIPSCs recorded from a PN before (control, black) and after 15 minutes incubation with 100 nM  $\alpha 5IA$  (blue). **E:** Representative averaged traces of fast (top) and slow (bottom) events recorded from MCs. Only amplitudes of slow events are affected by  $\alpha 5IA$  (blue trace, bottom panel). **F:** Population plot of individual cells, fast and slow sIPSCs median amplitudes measured in control and after incubation with  $\alpha 5IA$ . \* $p < 0.05$ , \*\* $p < 0.01$ .

405

406

407 **MCs inhibit PNs, but not other interneurons, through  $\alpha 5$ -GABA<sub>A</sub>Rs.**

408 In the previous sections, we showed that MCs make synaptic contacts exhibiting target-specific  
409 biophysical and physiological properties. We also showed that, among the inhibitory inputs received  
410 by PNs, those originating from MCs are distinguished by their sensitivity to  $\alpha 5$ IA. We therefore tested  
411 whether postsynaptic expression of  $\alpha 5$ -GABA<sub>A</sub>Rs is a trait shared by all synaptic contacts made by MCs  
412 or it is specific for synaptic contacts that MCs form on PN dendrites. To address this question, we  
413 measured unitary GABAergic synaptic transmission between MCs and other INs and tested their  
414 sensitivity to  $\alpha 5$ IA. We found that uIPSC amplitudes elicited by MCs and recorded in PV INs (control:  
415  $31 \pm 4$  pA,  $\alpha 5$ IA:  $35 \pm 6$  pA, n=11 pairs, p=0.3757, paired t test), L1 INs (control:  $83 \pm 32$  pA,  $\alpha 5$ IA:  $102$   
416  $\pm 29$  pA, n=5 pairs, p=0.3757, paired t test) and VIP INs (control:  $178 \pm 100$  pA,  $\alpha 5$ IA:  $118 \pm 52$  pA, n=4  
417 pairs, p=0.7432, Wilcoxon signed ranks test) were not sensitive to  $\alpha 5$ IA (Fig. 5 B-C).

418 In the hippocampus, SST-positive, OL-M INs receive  $\alpha 5$ -mediated inhibition from VIP INs (Magnin  
419 et al., 2019). Since VIP-MC synapses represent an important disinhibitory circuit in the cortex as well,  
420 we asked whether  $\alpha 5$ -GABA<sub>A</sub>Rs mediate inhibitory inputs from VIP INs also in the mouse  
421 somatosensory cortex. To address this question and to activate VIP INs specifically, while recording  
422 from GFP-expressing MCs, we crossed VIP-cre mice with X98 mice. Since dual whole-cell recordings  
423 showed a very low yield (3 connected out of 45 recorded pairs), we expressed the light-sensitive opsin  
424 ChR2 via injection of flexed-ChR2 AAV particles in the barrel cortex of VIPCre::X98 1-3-days-old pups.  
425 We recorded light-evoked IPSCs in MCs, and found that inhibitory responses originating at VIP cells  
426 were not sensitive to  $\alpha 5$ IA (control:  $170 \pm 46$  pA,  $\alpha 5$ IA:  $166 \pm 52$  pA, n=7, p=0.7432, Wilcoxon signed  
427 ranks test; Fig 5 B). Furthermore, the amplitude of sIPSCs recorded from MCs were not affected by  
428 incubation with 100 nM  $\alpha 5$ IA (control:  $32 \pm 1$  pA,  $\alpha 5$ IA:  $29 \pm 3$  pA, n=26, p=0.0659, Wilcoxon signed  
429 ranks test; Fig 5 E).

430 Overall, these results indicate that GABAergic inhibition to and from MCs uses  $\alpha 5$ -GABA<sub>A</sub>Rs  
431 exclusively at synapses formed with PN distal dendrites and not for other MC-targets within cortical

432 circuits. Thus, the characteristic slow kinetics of uIPSCs, the distal dendritic targeting and the synaptic  
 433 expression of  $\alpha 5$ -GABA<sub>A</sub>Rs represent unique molecular and cellular signatures of MC-PN synapses.

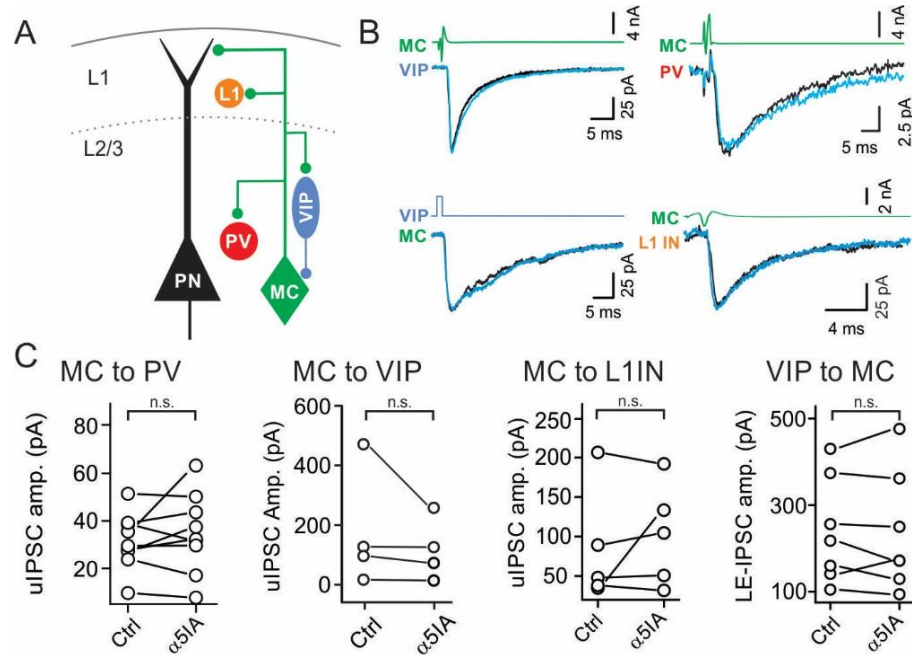

**Figure 5: Inhibitory synaptic transmission involving MCs and other interneurons does not rely on  $\alpha 5$ -GABA<sub>A</sub>Rs.**

**A:** Schematic representation of the tested inhibitory circuits involving MCs. **B:** Representative averaged voltage-clamp traces of uIPSCs from MCs onto different element of the circuit and from VIP to MC before (black) and after (blue) application of  $\alpha 5$ IA. **C:** Population data of uIPSC amplitude before (Ctrl) and 15 minutes after  $\alpha 5$ IA application.

434

435 **Tonic inhibition is mediated by  $\alpha 5$ -GABA<sub>A</sub>Rs in PN, but not MC nor PV-IN.**

436  $\alpha 5$ -GABA<sub>A</sub>Rs have been largely associated to tonic inhibition due to extrasynaptic immunoreactivity  
 437 in cell culture (Loebrich et al., 2006; Serwanski et al., 2006), hippocampus and cortex (Serwanski et al.,  
 438 2006) and amygdala (Botta et al., 2015) and the lack of tonic inhibitory current in hippocampal PNs of  
 439  $\alpha 5$  knock-out mice (Caraiscos et al., 2004).

440 Thus, we pre-incubated slices with ACSF or ACSF + 100 nM  $\alpha 5$ IA during at least 10 minutes and  
 441 then quantified the difference in holding current amplitude ( $\Delta I_{\text{hold}}$ ) before and after bath application  
 442 of 1  $\mu$ M gabazine (Fig. 6). Pre-incubation with 100 nM  $\alpha 5$ IA significantly reduced GABAergic  $\Delta I_{\text{hold}}$  in  
 443 PNs as compared to slices preincubated in ACSF only (ACSF:  $51 \pm 1$  pA, n=16;  $\alpha 5$ IA:  $29 \pm 7$  pA, n=23,

444 p=0.0244, unpaired t test; Fig. 6 A,B). A similar percentage of reduction was obtained incubating with  
445 500 nM  $\alpha$ 5IA (data not shown), ruling out that  $\alpha$ 5-GABA<sub>A</sub>Rs required higher drug concentrations.  
446 Conversely, incubation with  $\alpha$ 5IA failed to produce any significant change in tonic current recorded  
447 from MCs (ACSF:  $16 \pm 5$  pA, n=9;  $\alpha$ 5IA:  $23 \pm 6$  pA, n=14, p=0.3330, unpaired t test; Fig. 6 C,D) nor PV  
448 INs (ACSF:  $33 \pm 10$  pA, n=9;  $\alpha$ 5IA:  $24 \pm 5$  pA, n=14, p=0.6591, unpaired t test; Fig. 6 E,F), showing that  
449 tonic inhibition is mediated by  $\alpha$ 5-GABA<sub>A</sub>Rs exclusively in PNs.

450 Altogether, these results indicate that  $\alpha$ 5-GABA<sub>A</sub>Rs are selectively expressed by PNs and they  
451 mediate both tonic and dendritic, phasic synaptic inhibition.



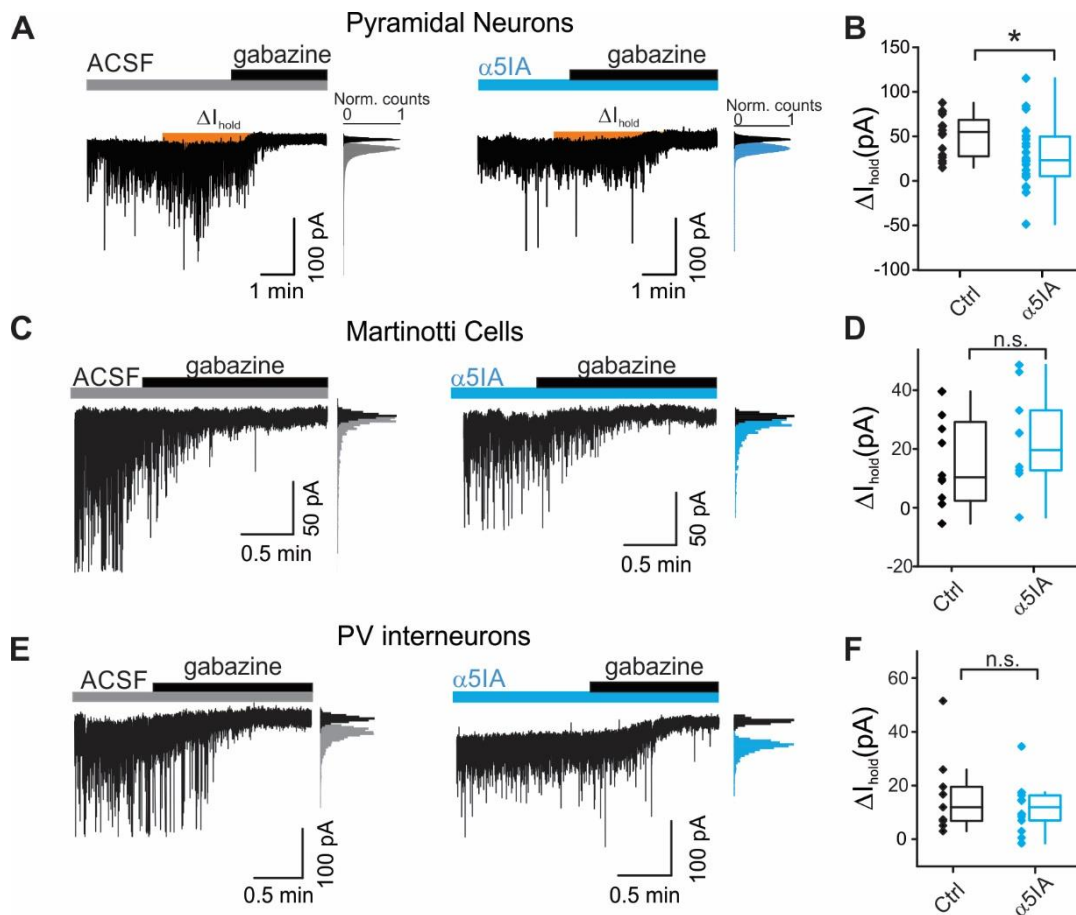

**Figure 6:  $\alpha 5GABA_A$ Rs only contribute to tonic inhibition in L2/3 PN of mouse somatosensory cortex.**

**A:** Whole-cell voltage-clamp recordings from L2/3 PNs preincubated with either vehicle (aCSF, left) or  $\alpha 51A$  (right). DNQX (10  $\mu M$ ) and GABA (5  $\mu M$ ) were continuously present in both conditions. Orange areas ( $\Delta I_{hold}$ ) represent tonic inhibition measured after gabazine onset (dotted red line). Insets: All-points histograms of the current trace obtained in the absence (grey and blue histograms) and presence of gabazine (black histograms). Gaussian fits were used to determine the noise half-width. **C-E:** same as in A for MCs and PV-INS, correspondingly. **B-D-F:** Population graphs of holding-current shifts after gabazine application ( $\Delta I_{hold}$ ). \*  $p < 0.05$ .

452

453

## 454 Discussion

455 In this study, we explored physiological aspects of different inhibitory synaptic connections made  
456 by MCs in the L2/3 of the mouse somatosensory cortex. We show that inhibitory synapses made by  
457 MCs display biophysical, morphological and pharmacological properties that are specific in distinct  
458 postsynaptic partners. We found that the most extensively contacted cells are PNs. However, also PV,

459 VIP and L1 inhibitory INs also receive significant inhibition from MCs. Notably, we showed that the  
460 MC-PN synapse is distinguished by two unique features: slow kinetics and expression of the  $\alpha 5$ -  
461 GABA<sub>A</sub>R. Finally, we showed that  $\alpha 5$ -GABA<sub>A</sub>Rs contribute to tonic inhibition of PNs but not of other  
462 INs, confirming the specific involvement of this receptor in PN dendritic inhibition.

463 SST-cre mouse lines are widely used to study the functional role of SST-expressing INs by  
464 manipulating and recording their activity, using cre-driven expression of light-sensitive opsins or  
465 genetically encoded Ca<sup>2+</sup> sensors (Taniguchi et al., 2011). Despite its extensive use, the SST-cre mouse  
466 line affects all interneurons expressing SST. Yet, SST-positive neurons encompass an heterogeneous  
467 group of inhibitory neurons that display different morphology and spiking patterns as well as diverse  
468 connectivity (Halabisky et al., 2006; Ma et al., 2006; McGarry et al., 2010; Naka et al., 2019). Therefore,  
469 it is important to focus the study of SST-positive neurons to defined homogeneous subpopulations, in  
470 order to prevent unwanted over-simplified conclusions. MCs represent a specific subpopulation of  
471 GABAergic interneurons, accounting for only 20% of all SST-expressing cells (Yavorska and Wehr,  
472 2016). Here we used the X98 mouse line to study MCs specifically (Ma et al., 2006). We provide  
473 evidence that GFP-expressing neurons in the somatosensory cortex from the X98 mouse line exhibit  
474 the typical anatomical and electrophysiological properties of MCs (Wang et al., 2004; Kapfer et al.,  
475 2007; Silberberg and Markram, 2007; Tremblay et al., 2016). In addition, glutamatergic recruitment of  
476 GFP-positive cells is strongly facilitating, as opposed to PV cells, another hallmark of MCs (Reyes et al.,  
477 1998). Therefore, we conclude that this mouse line represents an excellent tool to study inhibitory  
478 circuits involving MCs.

479 Even though MCs extensively inhibit PNs via  $\alpha 5$ -GABA<sub>A</sub>Rs, they also contact other elements of the  
480 cortical microcircuits, and, in addition, they are targeted by VIP-expressing interneurons (Pfeffer et al.,  
481 2013; Kepecs and Fishell, 2014; Tremblay et al., 2016; Walker et al., 2016). We found that MCs contact  
482 PV- VIP- and L1-INs at a reduced connectivity rate, as compared to MC-PN connections. Moreover,  
483 GABAergic synapses from MCs onto other interneurons and those inhibiting MCs from VIP-INs do not  
484 use  $\alpha 5$ -GABA<sub>A</sub>Rs.

485 MCs were hypothesized to provide a non-specific ‘blanket’ of inhibition to PNs (Fino and Yuste,  
486 2011; Fino et al., 2013; Karnani et al., 2016). Accordingly, we found a relatively high connectivity rates  
487 between MCs and L2/3 PNs, consistent with the prominent MC axonal plexus innervating L1. However,  
488 our results indicate that despite extensively innervating L1, MC axons possess a very strong tropism  
489 for PN dendrites. Yet, despite at lower rate, MCs do contact also L1-INs, which exert slow feed-forward  
490 inhibition on PN dendrites during the encoding of context-rich, top-down information from higher  
491 order thalamus and cortices (Letzkus et al., 2011; Abs et al., 2018).

492 Importantly, dendritic inhibition seems to be a specific feature of MC-PN connections, as uIPSC rise  
493 times measured on other MC targets (interneurons) had fast (<1 ms) kinetics similar to the known PV-  
494 PN perisomatic responses. In agreement with this view, we failed to find evidence of direct contact  
495 between MC axons on the perisomatic region of PNs. Conversely, we found MC putative boutons  
496 juxtaposed to the perisomatic region of PV, VIP and L1 INs. This is consistent with the fast, non-filtered,  
497 IPSCs observed in somatic whole-cell recordings and in line with a previous report showing that  
498 inhibitory contacts onto PV INs are preferentially located in the proximal dendrites and soma while  
499 excitatory inputs are located in distal dendrites (Kameda et al., 2012).

500 Use-dependent short-term facilitation or depression of synaptic responses has been traditionally  
501 linked to presynaptic loose- or tight-coupled synapses, identifying diverse cell types with specific  
502 biophysical presynaptic properties, such as low or high release probability, respectively (Jackman and  
503 Regehr, 2017). Importantly, frequency-dependent bidirectional short-term plasticity is a powerful  
504 synaptic tool to provide distinct cell types with a specific strategy to transfer information about  
505 presynaptic spike trains. We found that GABAergic synapses from MCs exhibit a stark target-cell-  
506 specific facilitation and depression. Target-cell-specific short-term plasticity and release probability,  
507 originating from the same cell type, was described at glutamatergic synapses from PNs recruiting  
508 different IN subtypes in the neocortex and hippocampus (Reyes et al., 1998). Our finding indicates  
509 that single-axon, target-specific bidirectional short-term plasticity occurs also at GABAergic synapses.  
510 Intriguingly, synapses made in L1 (with either PN distal dendrites or sparse INs) are depressing,

511 whereas, inhibitory connection that the same cells make onto their targets in L2/3 (PV and VIP cells)  
512 are either uniform or strongly facilitating. It will be interesting to determine the molecular and  
513 synaptic mechanisms by which the identity of the postsynaptic neuron determines the efficacy of  
514 GABAergic synapses originating from the same MC. Target cell type-dependent variability in  
515 presynaptic properties increases the computational power of neuronal networks. It will be therefore  
516 fundamental to understand the functional role of such a target-specific regulation of inhibitory  
517 synaptic efficacy.

518 MCs exhibit differential inhibitory strategies depending on the postsynaptic cell type: they  
519 modulate input onto PNs and they likely control, at least in part, the output activity of other  
520 interneurons. Therefore, inhibitory circuits formed by MCs seem to exhibit a more complex  
521 architecture and function than previously hypothesized as provider of a mere blanket of inhibition  
522 (Fino and Yuste, 2011).

523 In addition to the strong preference for distal apical dendrites, MCs display another PN-specific  
524 synaptic feature, as they use  $\alpha 5$ -GABA<sub>A</sub>Rs for synaptic dendritic inhibition. Indeed, GABAergic  
525 synapses from MCs to other interneurons are perisomatic and do not use  $\alpha 5$ -GABA<sub>A</sub>Rs. In fact, lack of  
526  $\alpha 5$ IA effects on tonic inhibition on PV and MCs suggest that these major IN subtypes do not express  
527 this GABA<sub>A</sub>R  $\alpha$  subunit. Interestingly, It has been recently reported that hippocampal Oriens-  
528 Lacunosum Moleculare INs also express,  $\alpha 5$ -GABA<sub>A</sub>Rs at synapses originating at VIP INs (Magnin et al.,  
529 2019). Yet, we did not find evidence of  $\alpha 5$ IA effect on VIP-IN-evoked IPSCs in MCs of the barrel cortex,  
530 suggesting that cortical MCs differ from their hippocampal counterparts. The  $\alpha 5$  subunit is much more  
531 strongly expressed in the hippocampus than in the neocortex (Lingford-Hughes et al., 2002).  
532 Therefore, it will be interesting to reveal whether  $\alpha 5$  has different circuit-specificity and/or plays a  
533 different role in these two areas. Likewise, it remains to be tested whether  $\alpha 5$ -GABA<sub>A</sub>Rs are also  
534 expressed by other subtypes of inhibitory neurons. Our results on L1-INs suggest that MCs do not use  
535  $\alpha 5$ -GABA<sub>A</sub>Rs at these synapses. However, L1 is populated by a heterogeneous IN population (Schuman

536 et al., 2019) and, since we did not use specific mouse lines to target distinct cell types, our data may  
537 have been collected from a relatively heterogeneous interneuron group.

538 In addition to dendritic filtering, MC-PN synaptic responses might be slow due to the specific  
539 properties of the  $\alpha 5$ -subunit itself, which is exclusively expressed at this synapse. The slow kinetics  
540 and the rectification of  $\alpha 5$ -GABA<sub>A</sub>Rs match the biophysical properties of NMDARs, which govern Ca<sup>2+</sup>  
541 signaling and dendritic computation in PNs (Branco and Häusser, 2010; Tran-Van-Minh et al., 2015;  
542 Schulz et al., 2018). Dendritic patch would be necessary to test this hypothesis, although the high  
543 series resistance typical of dendritic patch recordings might prevent an accurate analysis of fast  
544 currents.

545  $\alpha 5$ -GABA<sub>A</sub>Rs have been proposed to mediate tonic inhibition due to their sensitivity to nanomolar  
546 concentrations of GABA, their non-desensitizing properties and the lack of evidence supporting its  
547 implication in synaptic transmission (Caraiscos et al., 2004). However, knock down of radixin, the  
548 extrasynaptic scaffolding protein associated to  $\alpha 5$ -GABA<sub>A</sub>Rs did not produce any effect on GABA  
549 evoked current, suggesting that extrasynaptic  $\alpha 5$ -GABA<sub>A</sub>Rs might not be functional (Loebrich et al.,  
550 2006). Furthermore, the participation of  $\alpha 5$ -GABA<sub>A</sub>Rs in phasic synaptic inhibition has been recently  
551 demonstrated in different brain structures, namely the rat somatosensory cortex (Ali and Thomson,  
552 2008), mouse hippocampus (Schulz et al., 2018) and mouse prefrontal cortex (Zorrilla de San Martin  
553 et al., 2020). Even for action potential-dependent unitary responses between MCs and PNs, it is  
554 possible that GABA could spill over to peri- or extrasynaptic GABA<sub>A</sub>Rs containing  $\alpha 5$ . If this were the  
555 case, we would not have detected significant effects on quantal events, which reflect mostly purely  
556 synaptic activation of GABA<sub>A</sub>Rs. Importantly, we recorded sIPSCs from the soma of L2/3 PNs and found  
557 that only slow sIPSCs were sensitive to  $\alpha 5$ IA, whereas fast perisomatic inhibitory events were  
558 unaffected. Our results on sIPSCs corroborate the synaptic localization of  $\alpha 5$ -GABA<sub>A</sub>Rs. Indeed, at our  
559 extracellular K<sup>+</sup> concentrations, sIPSCs are dominated by AP independent miniature events. The  
560 blockade of MC-PN uIPSCs, slow sIPSCs and tonic inhibition was not total but it was in all cases  
561 maximal, taking into account the actual efficacy (~40%) of  $\alpha 5$ IA (Sternfeld et al., 2004; Atack, 2010).

562 Therefore, the most parsimonious interpretation of our pharmacological experiments is that  $\alpha 5$ -  
563 GABA<sub>A</sub>Rs are prominently expressed at synaptic sites of dendritic MC-PN connections and are  
564 responsible for dendritic inhibition from this specific GABAergic neuron type. In fact, the  $\alpha 5$ -mediated  
565 tonic currents could be the direct activation by ambient GABA of high affinity synaptic, and not  
566 necessarily extrasynaptic receptors.

567 The specific expression of the  $\alpha 5$  GABA<sub>A</sub>R subunit in PNs is particularly interesting in light of its  
568 involvement in cognitive processes. Mice lacking the *Gabra5* gene, encoding for the  $\alpha 5$  subunit of the  
569 GABA<sub>A</sub>R, show enhanced performance in cognitive tasks (Collinson et al., 2002). This evidence, in  
570 addition to the high  $\alpha 5$ -GABA<sub>A</sub>Rs expression in the mouse prefrontal cortex and hippocampus (Fritschy  
571 and Mohler, 1995) led to propose novel potential pro-cognitive pharmacological strategies. This  
572 strategy is being actively explored to treat intellectual disability in Down syndrome (Braudeau et al.,  
573 2011; Martínez-Cué et al., 2013; Duchon et al., 2019; Zorrilla de San Martin et al., 2020) and in other  
574 brain diseases characterized by memory impairments (Zurek et al., 2014) and depressive states (Zanos  
575 et al., 2017). Specific negative modulation of these receptors would facilitate cognition avoiding  
576 anxiogenic and pro-convulsive effects of wide spectrum GABA<sub>A</sub>Rs antagonists due to the restricted  
577 expression of the  $\alpha 5$  subunit to this specific inhibitory circuit formed by MCs.

578

## 579 **References**

- 580 Abs E, Poorthuis RB, Apelblat D, Muhammad K, Pardi MB, Enke L, Kushinsky D, Pu D-L, Eizinger MF,  
581 Conzelmann K-K, Spiegel I, Letzkus JJ (2018) Learning-Related Plasticity in Dendrite-Targeting  
582 Layer 1 Interneurons. *Neuron*:1–16.
- 583 Adesnik H, Bruns W, Taniguchi H, Huang ZJ, Scanziani M (2012) A neural circuit for spatial summation  
584 in visual cortex. *Nature* 490:226–230.
- 585 Adesnik H, Scanziani M (2010) Lateral competition for cortical space by layer-specific horizontal  
586 circuits. *Nature* 464:1155–1160.

- 587 Ali AB, Thomson AM (2008) Synaptic  $\alpha 5$  subunit-containing GABAA receptors mediate ipspS elicited  
588 by dendrite-preferring cells in rat neocortex. *Cereb Cortex* 18:1260–1271.
- 589 Atack JR (2010) Preclinical and clinical pharmacology of the GABAA receptor  $\alpha 5$  subtype-selective  
590 inverse agonist  $\alpha 5$ IA. *Pharmacol Ther* 125:11–26.
- 591 Bacci A, Rudolph U, Huguenard JR, Prince DA (2003) Major Differences in Inhibitory Synaptic  
592 Transmission onto Two Neocortical Interneuron Subclasses. *J Neurosci* 23:9664–9674.
- 593 Bartos M, Vida I, Jonas P (2007) Synaptic mechanisms of synchronized gamma oscillations in inhibitory  
594 interneuron networks. *Nat Rev Neurosci* 8:45–56.
- 595 Berger TK, Perin R, Silberberg G, Markram H, Berger TK (2009) Frequency-dependent disynaptic  
596 inhibition in the pyramidal network: a ubiquitous pathway in the developing rat neocortex. *J*  
597 *Physiol* 58722:5411–5425.
- 598 Botta P, Demmou L, Kasugai Y, Markovic M, Xu C, Fadok JP, Lu T, Poe MM, Xu L, Cook JM, Rudolph U,  
599 Sah P, Ferraguti F, Lüthi A (2015) Regulating anxiety with extrasynaptic inhibition. *Nat Neurosci*  
600 18:1493–1500.
- 601 Branco T, Häusser M (2010) The single dendritic branch as a fundamental functional unit in the  
602 nervous system. *Curr Opin Neurobiol* 20:494–502.
- 603 Braudeau J, Delatour B, Duchon A, Pereira PL, Dauphinot L, de Chaumont F, Olivo-Marin J-C, Dodd R,  
604 Hérault Y, Potier M-C (2011) Specific targeting of the GABA-A receptor  $\alpha 5$  subtype by a  
605 selective inverse agonist restores cognitive deficits in Down syndrome mice. *J Psychopharmacol*  
606 25:1030–1042.
- 607 Buzsáki G (2010) Neural Syntax: Cell Assemblies, Synapsembles, and Readers. *Neuron* 68:362–385.
- 608 Buzsáki G, Wang X-J (2012) Mechanisms of Gamma Oscillations. *Annu Rev Neurosci* 35:203–225.
- 609 Caraiscos VB, Elliott EM, You-Ten KE, Cheng VY, Belelli D, Newell JG, Jackson MF, Lambert JJ, Rosahl  
610 TW, Wafford K a, MacDonald JF, Orser B a (2004) Tonic inhibition in mouse hippocampal CA1

- 611 pyramidal neurons is mediated by alpha5 subunit-containing gamma-aminobutyric acid type A  
612 receptors. *Proc Natl Acad Sci U S A* 101:3662–3667.
- 613 Clem RL, Cummings KA (2020) Prefrontal somatostatin interneurons encode fear memory. *Nat*  
614 *Neurosci* 23:p61, 14 p.
- 615 Collinson N, Kuenzi FM, Jarolimek W, Maubach K a, Cothliff R, Sur C, Smith A, Otu FM, Howell O, Atack  
616 JR, McKernan RM, Seabrook GR, Dawson GR, Whiting PJ, Rosahl TW (2002) Enhanced learning  
617 and memory and altered GABAergic synaptic transmission in mice lacking the alpha 5 subunit of  
618 the GABAA receptor. *J Neurosci* 22:5572–5580.
- 619 Dawson GR, Maubach KA, Collinson N, Cobain M, Everitt BJ, MacLeod AM, Choudhury HI, McDonald  
620 LM, Pillai G, Rycroft W, Smith AJ, Sternfeld F, Tattersall FD, Wafford KA, Reynolds DS, Seabrook  
621 GR, Atack JR (2006) An inverse agonist selective for  $\alpha$ 5 subunit-containing GABA A receptors  
622 enhances cognition. *J Pharmacol Exp Ther* 316:1335–1345.
- 623 Duchon A, Gruart A, Albac C, Delatour B, Zorrilla de San Martin J, Delgado-García JM, Héroult Y, Potier  
624 MC (2019) Long-lasting correction of in vivo LTP and cognitive deficits of mice modelling Down  
625 syndrome with an  $\alpha$ 5-selective GABAA inverse agonist. *Br J Pharmacol* 177:1106–1118.
- 626 Duncan CE, Webster MJ, Rothmond DA, Bahn S, Elashoff M, Shannon Weickert C (2010) Prefrontal  
627 GABAA receptor  $\alpha$ -subunit expression in normal postnatal human development and  
628 schizophrenia. *J Psychiatr Res* 44:673–681.
- 629 Fino E, Packer AM, Yuste R (2013) The logic of inhibitory connectivity in the neocortex. *Neuroscientist*  
630 19:228–237.
- 631 Fino E, Yuste R (2011) Dense inhibitory connectivity in neocortex. *Neuron* 69:1188–1203.
- 632 Fritschy JM, Mohler H (1995) GABAA receptor heterogeneity in the adult rat brain: Differential regional  
633 and cellular distribution of seven major subunits. *J Comp Neurol* 359:154–194.
- 634 Gill K, Grace A (2014) The Role of  $\alpha$ 5 GABAA Receptor Agonists in the Treatment of Cognitive Deficits



- 635 in Schizophrenia. *Curr Pharm Des* 20:5069–5076.
- 636 Gouwens NW et al. (2020) Integrated Morphoelectric and Transcriptomic Classification of Cortical  
637 GABAergic Cells. *Cell* 183:935-953.e19.
- 638 Halabisky B, Shen F, Huguenard JR, Prince DA (2006) Electrophysiological classification of  
639 somatostatin-positive interneurons in mouse sensorimotor cortex. *J Neurophysiol* 96:834–845.
- 640 Hilscher MM, Leão RN, Edwards SJ, Leão KE, Kullander K, Bacci A (2016) ChRNA2-Martinotti Cells  
641 Synchronize layer 5 type A Pyramidal Cells via Rebound Excitation. *PLoS Biol* 15.
- 642 Isaacson JS, Scanziani M (2011) How inhibition shapes cortical activity. *Neuron* 72:231–243.
- 643 Jackman SL, Regehr WG (2017) The Mechanisms and Functions of Synaptic Facilitation. *Neuron*  
644 94:447–464.
- 645 Kameda H, Hioki H, Tanaka YH, Tanaka T, Sohn J, Sonomura T, Furuta T, Fujiyama F, Kaneko T (2012)  
646 Parvalbumin-producing cortical interneurons receive inhibitory inputs on proximal portions and  
647 cortical excitatory inputs on distal dendrites. *Eur J Neurosci* 35:838–854.
- 648 Kapfer C, Glickfeld LL, Atallah B V, Scanziani M (2007) Supralinear increase of recurrent inhibition  
649 during sparse activity in the somatosensory cortex. *Nat Neurosci* 10:743–753.
- 650 Karnani MM, Jackson J, Ayzenshtat I, Sichani XH, Manoocheri K, Kim S, Yuste R (2016) Opening holes  
651 in the blanket of inhibition: Localized lateral disinhibition by vip interneurons. *J Neurosci*  
652 36:3471–3480.
- 653 Kepecs A, Fishell G (2014) Interneuron cell types are fit to function. *Nature* 505:318–326.
- 654 Korpi ER, Mihalek RM, Sinkkonen ST, Hauer B, Hevers W, Homanics GE, Sieghart W, Lüddens H (2002)  
655 Altered receptor subtypes in the forebrain of GABAA receptor  $\delta$  subunit-deficient mice:  
656 Recruitment of  $\gamma$ 2 subunits. *Neuroscience* 109:733–743.
- 657 Letzkus JJ, Wolff SBE, Meyer EMM, Tovote P, Courtin J, Herry C, Lüthi A (2011) A disinhibitory  
658 microcircuit for associative fear learning in the auditory cortex. *Nature* 480:331–335.

- 659 Lingford-Hughes A, Hume SP, Feeney A, Hirani E, Osman S, Cunningham VJ, Pike VW, Brooks DJ, Nutt  
660 DJ (2002) Imaging the GABA-benzodiazepine receptor subtype containing the alpha5-subunit in  
661 vivo with [<sup>11</sup>C]Ro15 4513 positron emission tomography. *J Cereb Blood Flow Metab* 22:878–  
662 889.
- 663 Loebrich S, Bä Hring R, Katsuno T, Tsukita S, Kneussel M (2006) Activated radixin is essential for GABA  
664 A receptor  $\alpha$ 5 subunit anchoring at the actin cytoskeleton. *EMBO J* 25:987–999.
- 665 Lovett-Barron M, Turi GF, Kaifosh P, Lee PH, Bolze F, Sun X-HH, Nicoud J-FF, Zemelman B V, Sternson  
666 SM, Losonczy A (2012) Regulation of neuronal input transformations by tunable dendritic  
667 inhibition. *Nat Neurosci* 15:423–430.
- 668 Ma Y, Hu H, Berrebi AS, Mathers PH, Agmon A (2006) Distinct subtypes of somatostatin-containing  
669 neocortical interneurons revealed in transgenic mice. *J Neurosci* 26:5069–5082.
- 670 Magnin E, Francavilla R, Amalyan S, Gervais E, David LS, Luo X, Topolnik L (2019) Input-specific synaptic  
671 location and function of the  $\alpha$ 5 GABA a receptor subunit in the mouse CA1 hippocampal neurons.  
672 *J Neurosci* 39:788–801.
- 673 Martínez-Cué C, Martinez P, Rueda N, Vidal R, Garcia S, Vidal V, Corrales A, Montero JA, Pazos A, Florez  
674 J, Gasser R, Thomas AW, Honer M, Knoflach F, Trejo JL, Wettstein JG, Hernandez M-C (2013)  
675 Reducing GABAA 5 Receptor-Mediated Inhibition Rescues Functional and Neuromorphological  
676 Deficits in a Mouse Model of Down Syndrome. *J Neurosci* 33:3953–3966.
- 677 McGarry LM, Packer AM, Fino E, Nikolenko V, Sippy T, Yuste R (2010) Quantitative classification of  
678 somatostatin-positive neocortical interneurons identifies three interneuron subtypes. *Front*  
679 *Neural Circuits* 4.
- 680 Möhler H (2002) Pathophysiological aspects of diversity in neuronal inhibition: A new benzodiazepine  
681 pharmacology. *Dialogues Clin Neurosci* 4:261–269.
- 682 Naka A, Veit J, Shababo B, Chance RK, Risso D, Stafford D, Snyder B, Egladyous A, Chu D, Sridharan S,

- 683 Mossing DP, Paninski L, Ngai J, Adesnik H (2019) Complementary networks of cortical  
684 somatostatin interneurons enforce layer specific control. *Elife* 8:1–36.
- 685 Paul A, Crow M, Raudales R, He M, Gillis J, Huang ZJ (2017) Transcriptional Architecture of Synaptic  
686 Communication Delineates GABAergic Neuron Identity. *Cell* 171:522-539.e20.
- 687 Pfeffer CK, Xue M, He M, Huang ZJ, Scanziani M (2013) Inhibition of inhibition in visual cortex: The  
688 logic of connections between molecularly distinct interneurons. *Nat Neurosci* 16:1068–1076.
- 689 Reyes A, Lujan R, Rozov A, Burnashev N, Somogyi P, Sakmann B (1998) Target-cell-specific facilitation  
690 and depression in neocortical circuits. *Nat Neurosci* 1:279–285.
- 691 Rusakov DA, Fine A (2003) Extracellular Ca<sup>2+</sup> depletion contributes to fast activity-dependent  
692 modulation of synaptic transmission in the brain. *Neuron* 37:287–297.
- 693 Scala F, Kobak D, Shan S, Bernaerts Y, Laternus S, Cadwell CR, Hartmanis L, Froudarakis E, Castro JR,  
694 Tan ZH, Papadopoulos S, Patel SS, Sandberg R, Berens P, Jiang X, Tolias AS (2019) Layer 4 of  
695 mouse neocortex differs in cell types and circuit organization between sensory areas. *Nat*  
696 *Commun* 10.
- 697 Scheggia D, Manago F, Maltese F, Bruni S, Nigro M, Latuske P, Contarini G, Gomez-Gonzola M, Requeie  
698 LM, Ferretti V, Castellani G, Mauro D, Bonavia A, Carmignoto G, Yizhar O, Papaleo F (2019)  
699 Somatostatin interneurons in the prefrontal cortex control affective state discrimination in mice.  
700 *Nat Neurosci* 23.
- 701 Schulz JM, Knoflach F, Hernandez M-C, Bischofberger J (2018) Dendrite-targeting interneurons control  
702 synaptic NMDA-receptor activation via nonlinear  $\alpha$ 5-GABAA receptors. *Nat Commun* 9:3576.
- 703 Schulz JM, Knoflach F, Hernandez MC, Bischofberger J (2019) Enhanced dendritic inhibition and  
704 impaired NMDAR activation in a mouse model of down syndrome. *J Neurosci* 39:5210–5221.
- 705 Schuman B, Machold RP, Hashikawa Y, Fuzik J, Fishell GJ, Rudy B (2019) Four unique interneuron  
706 populations reside in neocortical layer 1. *J Neurosci* 39:125–139.

- 707 Serwanski DR, Miralles CP, Christie SB, Mehta AK, Li X, Blas AL De (2006) Synaptic and non-synaptic  
708 localization of GABA A receptors containing the alpha5 subunit in the rat brain. *J Comp Neurol*  
709 *Neurol* 499:458–470.
- 710 Silberberg G, Markram H (2007) Disynaptic Inhibition between Neocortical Pyramidal Cells Mediated  
711 by Martinotti Cells. *Neuron* 53:735–746.
- 712 Sternfeld F, Carling RW, Jelley RA, Ladduwahetty T, Merchant KJ, Moore KW, Reeve AJ, Street LJ,  
713 O'Connor D, Sohal B, Attack JR, Cook S, Seabrook G, Wafford K, Tattersall FD, Collinson N, Dawson  
714 GR, Castro JL, MacLeod AM (2004) Selective, Orally Active  $\gamma$ -Aminobutyric Acid  $\alpha$ 5 Receptor  
715 Inverse Agonists as Cognition Enhancers. *J Med Chem* 47:2176–2179.
- 716 Taniguchi H, He M, Wu P, Kim S, Paik R, Sugino K, Kvitsani D, Fu Y, Lu J, Lin Y, Miyoshi G, Shima Y, Fishell  
717 G, Nelson SB, Huang ZJ (2011) A Resource of Cre Driver Lines for Genetic Targeting of GABAergic  
718 Neurons in Cerebral Cortex. *Neuron* 71:995–1013.
- 719 Tran-Van-Minh A, Cazé RD, Abrahamsson T, Cathala L, Gutkin BS, DiGregorio DA (2015) Contribution  
720 of sublinear and supralinear dendritic integration to neuronal computations. *Front Cell Neurosci*  
721 9:67.
- 722 Tremblay R, Lee S, Rudy B (2016) GABAergic Interneurons in the Neocortex: From Cellular Properties  
723 to Circuits. *Neuron* 91:260–292.
- 724 Walker F, Möck M, Feyerabend M, Guy J, Wagener RJ, Schubert D, Staiger JF, Witte M (2016)  
725 Parvalbumin-and vasoactive intestinal polypeptide-expressing neocortical interneurons impose  
726 differential inhibition on Martinotti cells. *Nat Commun* 7.
- 727 Wang Y, Toledo-Rodriguez M, Gupta A, Wu C, Silberberg G, Luo J, Markram H (2004) Anatomical,  
728 physiological and molecular properties of Martinotti cells in the somatosensory cortex of the  
729 juvenile rat. *J Physiol* 561:65–90.
- 730 Wilson NR, Runyan CA, Wang FL, Sur M (2012) Division and subtraction by distinct cortical inhibitory

- 731 networks in vivo. *Nature* 488:343–348.
- 732 Xu H, Jeong HY, Tremblay R, Rudy B (2013) Neocortical Somatostatin-Expressing GABAergic  
733 Interneurons Disinhibit the Thalamorecipient Layer 4. *Neuron* 77:155–167.
- 734 Yavorska I, Wehr M (2016) Somatostatin-expressing inhibitory interneurons in cortical circuits. *Front*  
735 *Neural Circuits* 10:76.
- 736 Zanos P, Nelson ME, Highland JN, Krimmel SR, Georgiou P, Gould TD, Thompson SM (2017) A negative  
737 allosteric modulator for  $\alpha 5$  subunit- containing GABA receptors exerts a rapid and persistent  
738 antidepressant-like action without the side effects of the NMDA receptor antagonist ketamine  
739 in mice. *eNeuro* 4:285–301.
- 740 Zorrilla de San Martin J, Donato C, Peixoto J, Aguirre A, Choudhary V, De Stasi AM, Lourenço J, Potier  
741 MC, Bacci A (2020) Alterations of specific cortical GABAergic circuits underlie abnormal network  
742 activity in a mouse model of down syndrome. *Elife* 9:1–54.
- 743 Zurek AA, Yu J, Wang DS, Haffey SC, Bridgwater EM, Penna A, Lecker I, Lei G, Chang T, Salter EWR,  
744 Orser BA (2014) Sustained increase in  $\alpha 5$ GABAareceptor function impairs memory after  
745 anesthesia. *J Clin Invest* 124:5437–5441.
- 746
